# Supplementary material for: Early Pathogenesis of Wesselsbron Disease in Pregnant Ewes
Source: MDPI journal article supplement (doi:10.3390/pathogens9050373), 2020-05-13
Supplement: s1 [file s1]

**Supplementary Materials:** [www.mdpi.com/xxx/s1](http://www.mdpi.com/xxx/s1), Figure S1: WSLV infection in human brain cell lines.

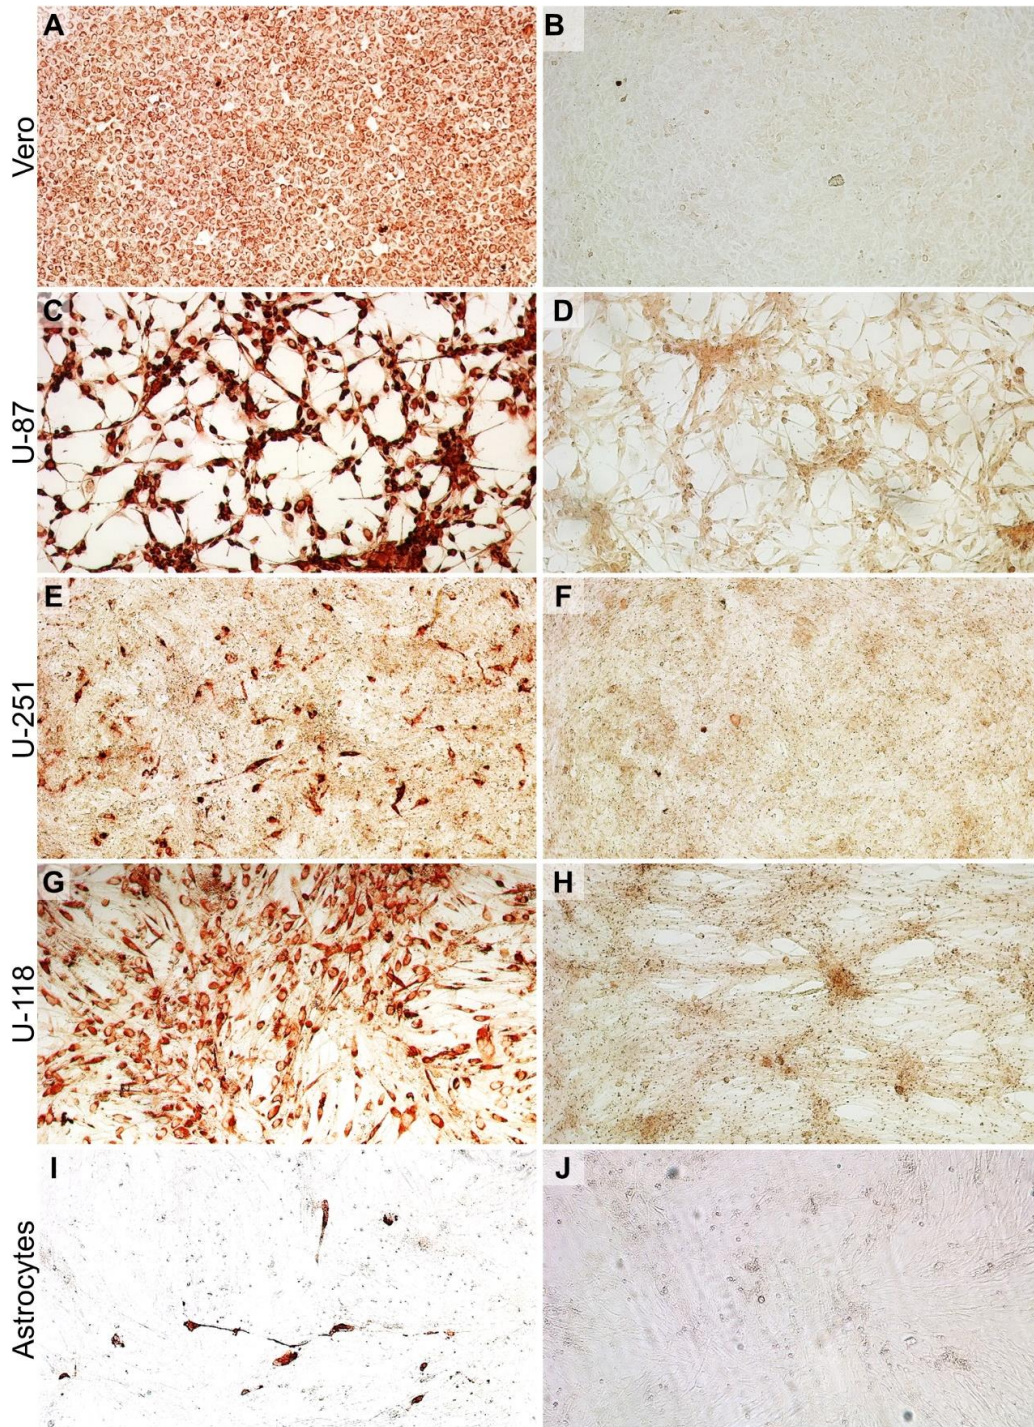

**Figure S1.** WSLV and mock infection of Vero cells (A,B), human glioma cells (U-87, C and D; U251, E and F; U118, G and H) and human astrocytes (I and J). All cells were infected with a MOI of 0.1 (based on WSLV titre determined on Vero cells) and incubated for 3 days. An immunoperoxidase monolayer assay (IPMA) was subsequently performed to visualise infected cells. Briefly, cells were fixed and permeabilised at 3 dpi with 4% paraformaldehyde (10 min) and ice-cold methanol (10 min). After permeabilisation, the plates were incubated with rabbit polyclonal antibodies recognizing WSLV NS1, followed by incubation with polyclonal rabbit- $\alpha$ -mouse immunoglobulin/HRP antibody (Dako, Denmark) as secondary antibody and 3-Amino-9-ethylcarbazole (AEC; Sigma-Aldrich) as substrate.
